# Supplementary material for: p38 inhibition provides anti–DNA virus immunity by regulation of USP21 phosphorylation and STING activation
Source: PubMed Central journal article supplement — J Exp Med. 2017 Apr 3;214(4):991–1010. doi: 10.1084/jem.20161387 (PMC5379979; doi:10.1084/jem.20161387), 2017-04-03
Supplement: JEM_20161387_sm.pdf [file JEM_20161387_sm.pdf]

SUPPLEMENTAL MATERIAL

Chen et al., <https://doi.org/10.1084/jem.20161387>

Table S1. Mass spectrometry analysis of binding partner of exogenous human USP21 in HeLa infected with HSV-1

| Protein                             | Identified peptide     |
|-------------------------------------|------------------------|
| Mitogen-activated protein kinase 14 | YQNLSVPGSGAYGSVcAAFDTK |
| Mitogen-activated protein kinase 14 | LSRPFQSIHAK            |
| Mitogen-activated protein kinase 14 | MNFANVFIGANPLAVDLLEK   |
| Mitogen-activated protein kinase 14 | HENVIGLLDVFTPAR        |
| Mitogen-activated protein kinase 14 | LTDDHVQFLIYQILR        |
| Mitogen-activated protein kinase 14 | DLKPSNLAVNEDcELK       |
| Stimulator of IFN genes protein     | LIAYQEPADDSSFSLSQEVLR  |
| Stimulator of IFN genes protein     | TLEDILADAPESQNNcR      |
| Stimulator of IFN genes protein     | QEEKEEVTVGS�K          |
| Stimulator of IFN genes protein     | VYSNSIYELLENGQR        |

Table S2. Mass spectrometry analysis of serine-phosphorylated residues of exogenous human USP21 in HeLa infected with HSV-1

| Site | Identified peptide                      | Modification |
|------|-----------------------------------------|--------------|
| S93  | ADHGVPLPGsPPPTVALPLPSR                  | S10(Phospho) |
| S335 | RAPPILANGPVPsPPRR                       | S13(Phospho) |
|      | APPILANGPVPsPPR                         | S12(Phospho) |
|      | RAPPILANGPVPsPPR                        | S13(Phospho) |
|      | APPILANGPVPsPPRR                        | S12(Phospho) |
| S538 | CQTGWVHYNDSRVsPVSENQVASSEGYVLFYQLMQEPPR | S14(Phospho) |

Table S3. Inhibitor library information

| Gel            | No. | Name or activity                   | M.W.  | Con. (mM) | Purity by HPLC (%) | PubChem Compound ID# | p-USP21 Intensity |
|----------------|-----|------------------------------------|-------|-----------|--------------------|----------------------|-------------------|
| Gel 1 (top)    | 1   | DMSO                               |       |           |                    |                      | +++               |
| Gel 1 (top)    | 2   | Akt Inhibitor V,Triciribine        | 320.3 | 10        | 99.16              | 290486               | +++               |
| Gel 1 (top)    | 3   | Aurora Kinase Inhibitor II         | 400.4 | 10        | 98.70              | 6610278              | ++                |
| Gel 1 (top)    | 4   | DNA-PK Inhibitor II                | 281.3 | 10        | 99.70              | 9860529              | ++                |
| Gel 1 (top)    | 5   | EGFR Inhibitor                     | 413.4 | 10        | 99.34              | 9549299              | +                 |
| Gel 1 (top)    | 6   | JAK Inhibitor I                    | 309.3 | 10        | 98.51              | 5494425              | ++                |
| Gel 1 (top)    | 7   | JAK3 Inhibitor IV                  | 367.9 | 10        | 97.86              | 176406               | ++                |
| Gel 1 (top)    | 8   | Rapamycin                          | 914.2 | 10        | 95.71              | 16760631             | ++                |
| Gel 1 (top)    | 9   | TGF- $\beta$ RI Kinase Inhibitor   | 272.3 | 10        | 100.00             | 447966               | ++                |
| Gel 1 (top)    | 10  | VEGFR Tyrosine Kinase Inhibitor IV | 472.9 | 10        | 97.75              | 9549295              | ++                |
| Gel 1 (top)    | 11  | SB202190 p38 inhibitor             | 331.3 | 10        | 98.00              | 5353940              | -                 |
| Gel 2 (bottom) | 12  | DMSO                               |       |           |                    |                      | +++               |
| Gel 2 (bottom) | 13  | ATM Kinase Inhibitor               | 395.5 | 10        | 99.00              | 5278396              | +++               |
| Gel 2 (bottom) | 14  | Cdk1 Inhibitor                     | 294.7 | 10        | 100.00             | 5472558              | +++               |
| Gel 2 (bottom) | 15  | Casein Kinase I Inhibitor, D4476   | 398.4 | 10        | 99.90              | 6419753              | +++               |
| Gel 2 (bottom) | 16  | ERK Inhibitor III                  | 318.3 | 10        | 97.90              | 5339183              | +++               |
| Gel 2 (bottom) | 17  | ERK Inhibitor II, FR180204         | 327.3 | 10        | 99.00              | 11493598             | +++               |
| Gel 2 (bottom) | 18  | GSK-3 $\beta$ Inhibitor I          | 222.3 | 10        | 98.60              | 4124851              | +++               |
| Gel 2 (bottom) | 19  | IC261                              | 311.3 | 10        | 95.90              | 3674                 | +++               |
| Gel 2 (bottom) | 20  | JNK Inhibitor II                   | 220.2 | 10        | 99.00              | 8515                 | +++               |
| Gel 2 (bottom) | 21  | JNK Inhibitor, Negative Control    | 234.2 | 10        | 99.90              | 11665831             | +++               |
| Gel 2 (bottom) | 22  | MEK Inhibitor I                    | 374.5 | 10        | 96.80              | 9951490              | +++               |

Table S4. **Primer for *Usp21* mice genotype identification**

| Primers                                         |                            |
|-------------------------------------------------|----------------------------|
| Primer for <i>Usp21</i> genotype identification |                            |
| <i>Usp21-1</i>                                  | 5'-GGTGAGGACTTGACAGCACA-3' |
| <i>Usp21-2</i>                                  | 5'-CCTAAGGACCCAAGGAAGAA-3' |
| <i>Usp21-3</i>                                  | 5'-AACTACAAGGGGATCCCAAG-3' |
| Primer for <i>Lyz2</i> genotype identification  |                            |
| <i>Lyz2-1</i>                                   | 5'-CCCAGAAATGCCAGATTACG-3' |
| <i>Lyz2-2</i>                                   | 5'-CTGGGCTGCCAGAATTCTC-3'  |
| <i>Lyz2-3</i>                                   | 5'-TTACAGTCGGCCAGGCTGAC-3' |

Table S5. **qPCR primers**

| Type                                    | Primer                         |
|-----------------------------------------|--------------------------------|
| <i>Gapdh: sense</i>                     | 5'-GTCGTGGAGTCTACTGGTGTG-3'    |
| <i>Gapdh: antisense</i>                 | 5'-GAGCCCTCCACAATGCCAAA-3'     |
| <i>Ifnb: sense</i>                      | 5'-TCCGAGCAGAGATCTTCAGGAA-3'   |
| <i>Ifnb: antisense</i>                  | 5'-TGCAACCACCACTCATTCTGAG-3'   |
| <i>Ifna4: sense</i>                     | 5'-CCTGTGTGATGCAGGAACC-3'      |
| <i>Ifna4: antisense</i>                 | 5'-TCACCTCCCAGGCACAGA-3'       |
| <i>Isg15: sense</i>                     | 5'-TGGCCTGGGACCTAAAGGTGAAGA-3' |
| <i>Isg15: antisense</i>                 | 5'-TGCACTGGGCTTTAGGCCATACT-3'  |
| <i>Tnfa: sense</i>                      | 5'-GACCCCTCACACTCAGATCAT-3'    |
| <i>Tnfa: antisense</i>                  | 5'-TTGAAGAGAACCTGGGAGTA-3'     |
| <i>Usp21: sense</i>                     | 5'-TGCGTCCAATGGGGATTGC-3'      |
| <i>Usp21: antisense</i>                 | 5'-GGCTCTGTCCGTATGCTGA-3'      |
| <i>GAPDH: sense</i>                     | 5'-TCTCCTCTGTGCTCTTGC-3'       |
| <i>GAPDH: antisense</i>                 | 5'-TCTGACTTCAACAGCGACAC-3'     |
| <i>USP21: sense</i>                     | 5'-CGAATCCTCGTGCTCCATC-3'      |
| <i>USP21: antisense</i>                 | 5'-GCTCCTGCATCAGTTGGTAG-3'     |
| <i>IFN<math>\beta</math>: sense</i>     | 5'-CACGACAGCTCTTCCATGA-3'      |
| <i>IFN<math>\beta</math>: antisense</i> | 5'-AGCCAGTGCTCGATGAATCT-3'     |
| <i>VSV: sense</i>                       | 5'-ACGGCGTACTTCCAGATGG-3'      |
| <i>VSV: antisense</i>                   | 5'-CTCGGTTCAAGATCCAGGT-3'      |
